# Supplementary material for: New Marine Fungal Deoxy-14,15-Dehydroisoaustamide Resensitizes Prostate Cancer Cells to Enzalutamide
Source: MDPI journal article supplement (doi:10.3390/md21010054), 2023-01-14
Supplement: s1 [file s1]

# **SUPPLEMENTARY INFORMATION**

# New Marine Fungal Deoxy-14,15-Dehydroisoaustamide Resensitizes Prostate Cancer Cells to Enzalutamide

Sergey A. Dyshlovoy <sup>1,2,\* , †</sup> , Olesya I. Zhuravleva <sup>2,3,†</sup> , Jessica Hauschild <sup>1</sup> , Tobias Busenbender <sup>1</sup> , Dmitry N. Pelageev <sup>3</sup> , Anton N. Yurchenko <sup>3</sup> , Yuliya V. Khudyakova <sup>3</sup> , Alexandr S. Antonov <sup>3</sup> , Markus Graefen <sup>4</sup> , Carsten Bokemeyer <sup>1</sup> and Gunhild von Amsberg <sup>1,4</sup>

<sup>1</sup> Laboratory of Experimental Oncology, Department of Oncology, Hematology and Bone Marrow Transplantation with Section Pneumology, Hubertus Wald-Tumorzentrum—University Cancer Center Hamburg (UCCH), University Medical Center Hamburg-Eppendorf, 20246 Hamburg, Germany

<sup>2</sup> Institute of High Technologies and Advanced Materials, Far Eastern Federal University, Vladivostok 690922, Russia

<sup>3</sup> G.B. Elyakov Pacific Institute of Bioorganic Chemistry, Far Eastern Branch of the Russian Academy of Sciences, Prospect 100-Letiya Vladivostoka, Vladivostok 690022, Russia

<sup>4</sup> Martini-Klinik Prostate Cancer Center, University Hospital Hamburg-Eppendorf, 20246 Hamburg, Germany

\* Correspondence: [s.dyshlovoy@uke.de](mailto:s.dyshlovoy@uke.de)

† These authors contributed equally to this work.

## Content

|                                                                                                                                                |    |
|------------------------------------------------------------------------------------------------------------------------------------------------|----|
| Figure S1. CD spectrum of <b>1</b> .....                                                                                                       | 4  |
| Figure S2. UV spectrum of <b>1</b> .....                                                                                                       | 4  |
| Figure S3. <sup>1</sup> H NMR spectrum (700 MHz, CDCl <sub>3</sub> ) of <b>1</b> .....                                                         | 5  |
| Figure S4. <sup>13</sup> C NMR spectrum (176 MHz, CDCl <sub>3</sub> ) of <b>1</b> .....                                                        | 8  |
| Figure S5. DEPT-135 spectrum (176 MHz, CDCl <sub>3</sub> ) of <b>1</b> .....                                                                   | 10 |
| Figure S6. COSY-45 spectrum (700 MHz, CDCl <sub>3</sub> ) of <b>1</b> .....                                                                    | 11 |
| Figure S7. HSQC spectrum (500 MHz, CDCl <sub>3</sub> ) of <b>1</b> .....                                                                       | 12 |
| Figure S8. HMBC spectrum (500 MHz, CDCl <sub>3</sub> ) of <b>1</b> .....                                                                       | 13 |
| Figure S9. NOESY spectrum (700 MHz, CDCl <sub>3</sub> ) of <b>1</b> .....                                                                      | 14 |
| Figure S10. <sup>1</sup> H NMR spectrum (500 MHz, CDCl <sub>3</sub> ) of <b>1</b> (synthetic) .....                                            | 15 |
| Figure S11. HR ESI mass spectrum of <b>1</b> .....                                                                                             | 17 |
| Figure S12. HPLC chromatogram of <b>1</b> . 3-CelluCoat RP (Kromasil, Sweden) (5 μm, 4.6 mm × 150 mm) column, acetonitrile–water (50:50) ..... | 18 |

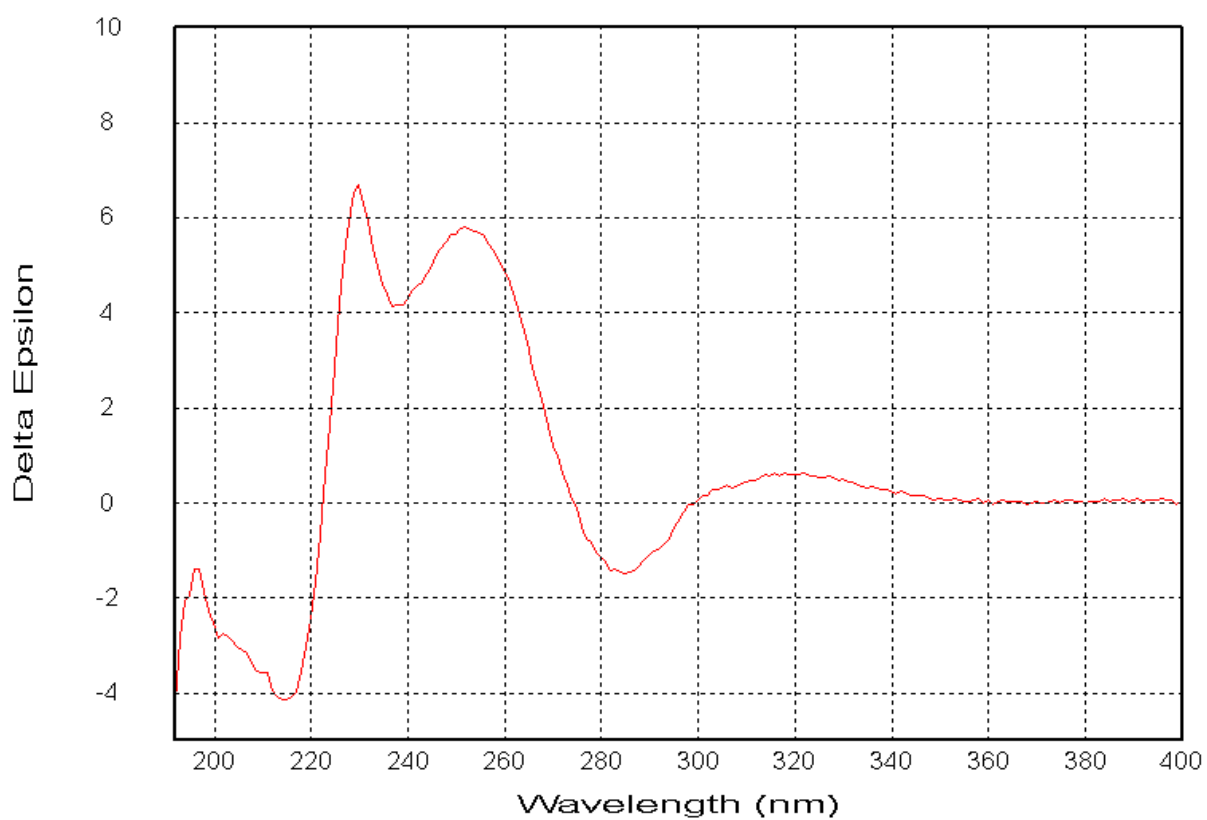

Figure S1. CD spectrum of **1**

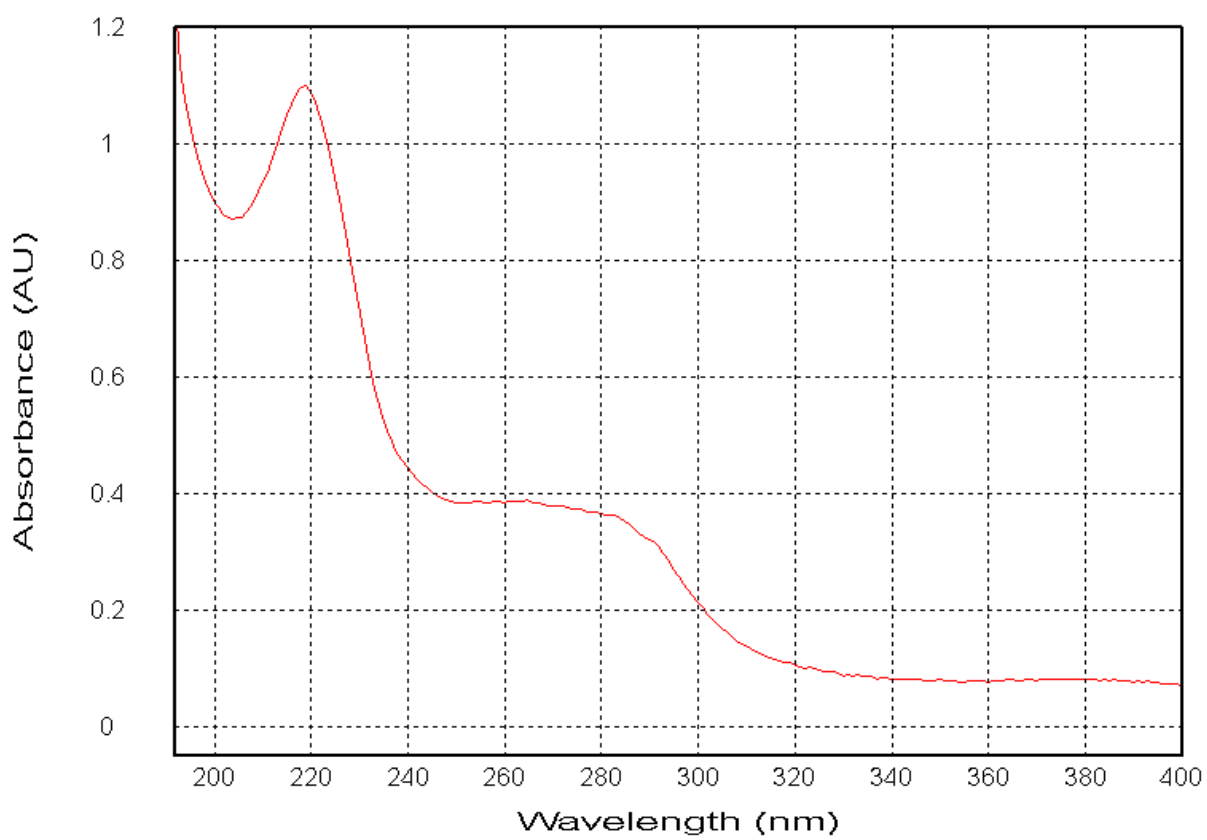

Figure S2. UV spectrum of **1**

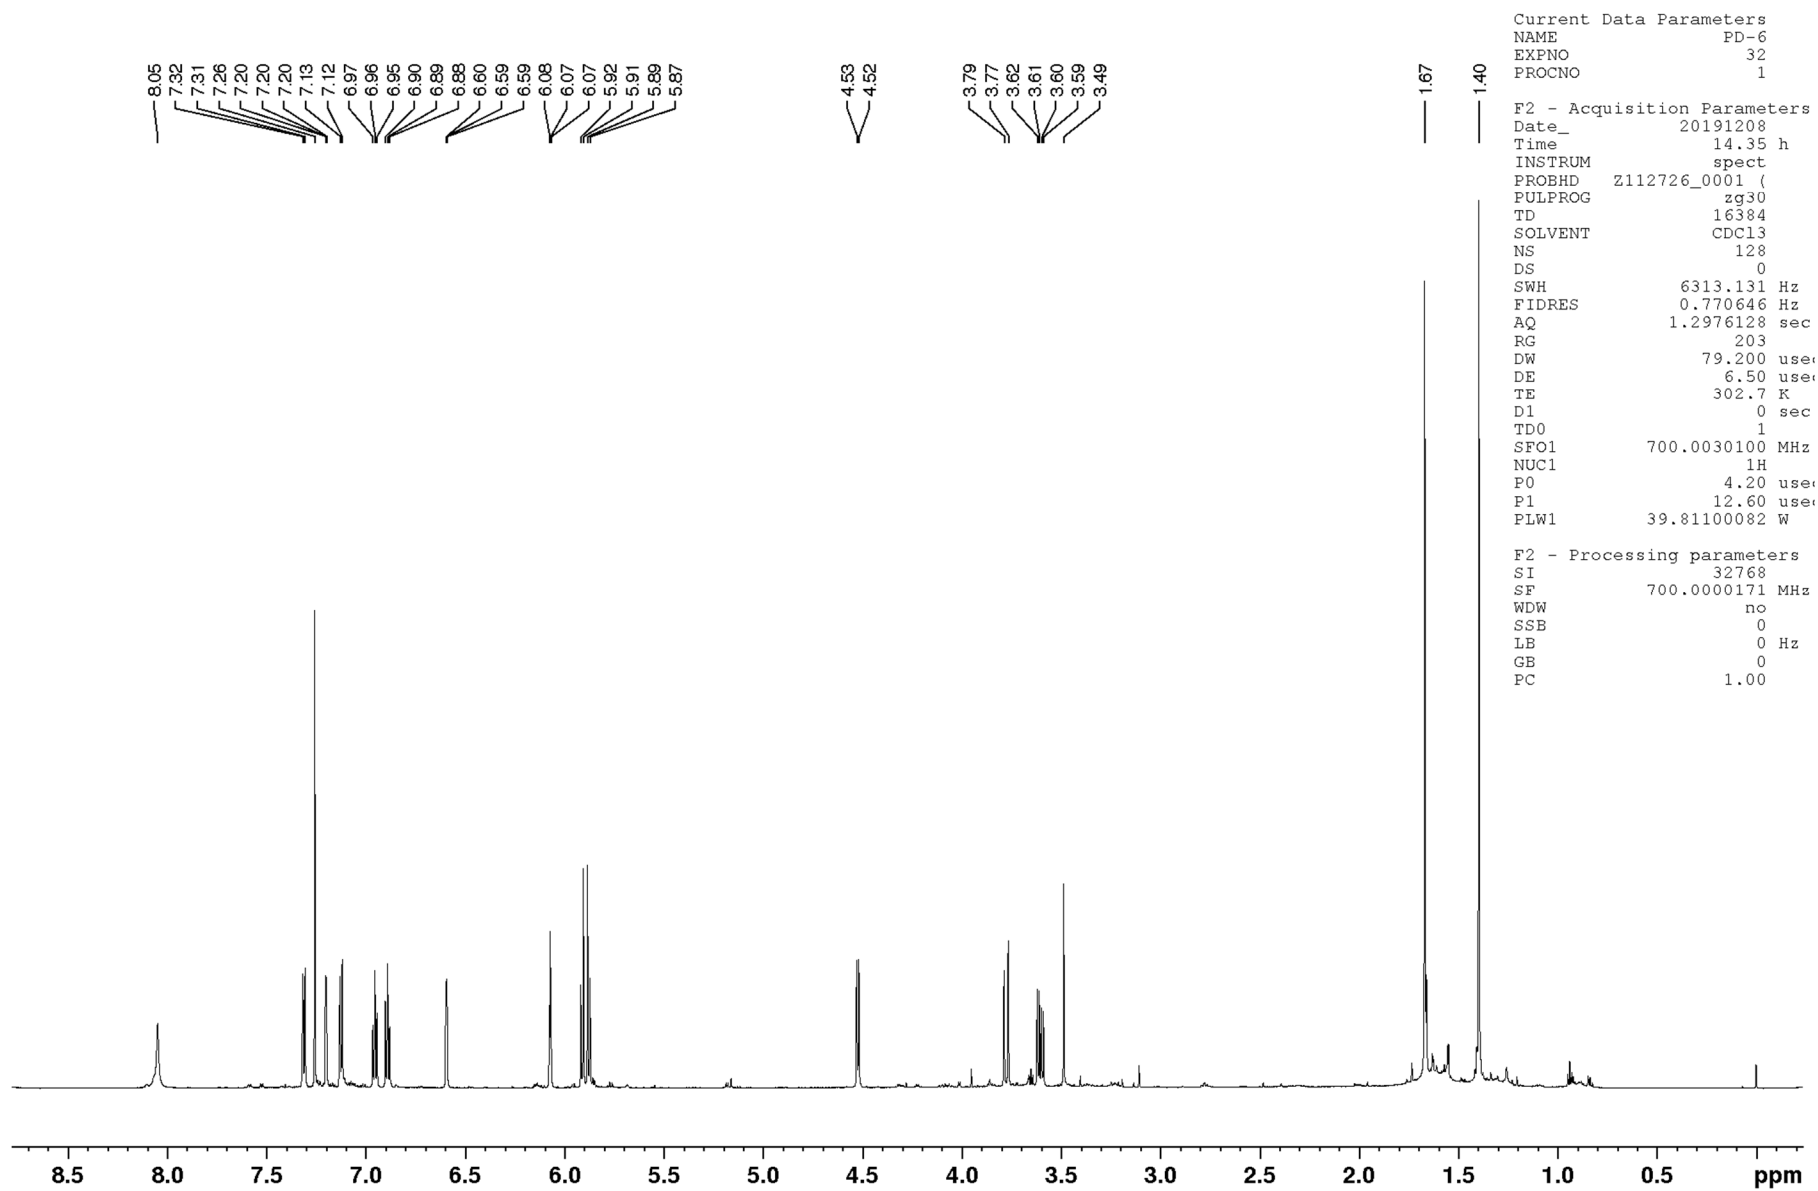

Figure S3.  $^1\text{H}$  NMR spectrum (700 MHz,  $\text{CDCl}_3$ ) of **1**

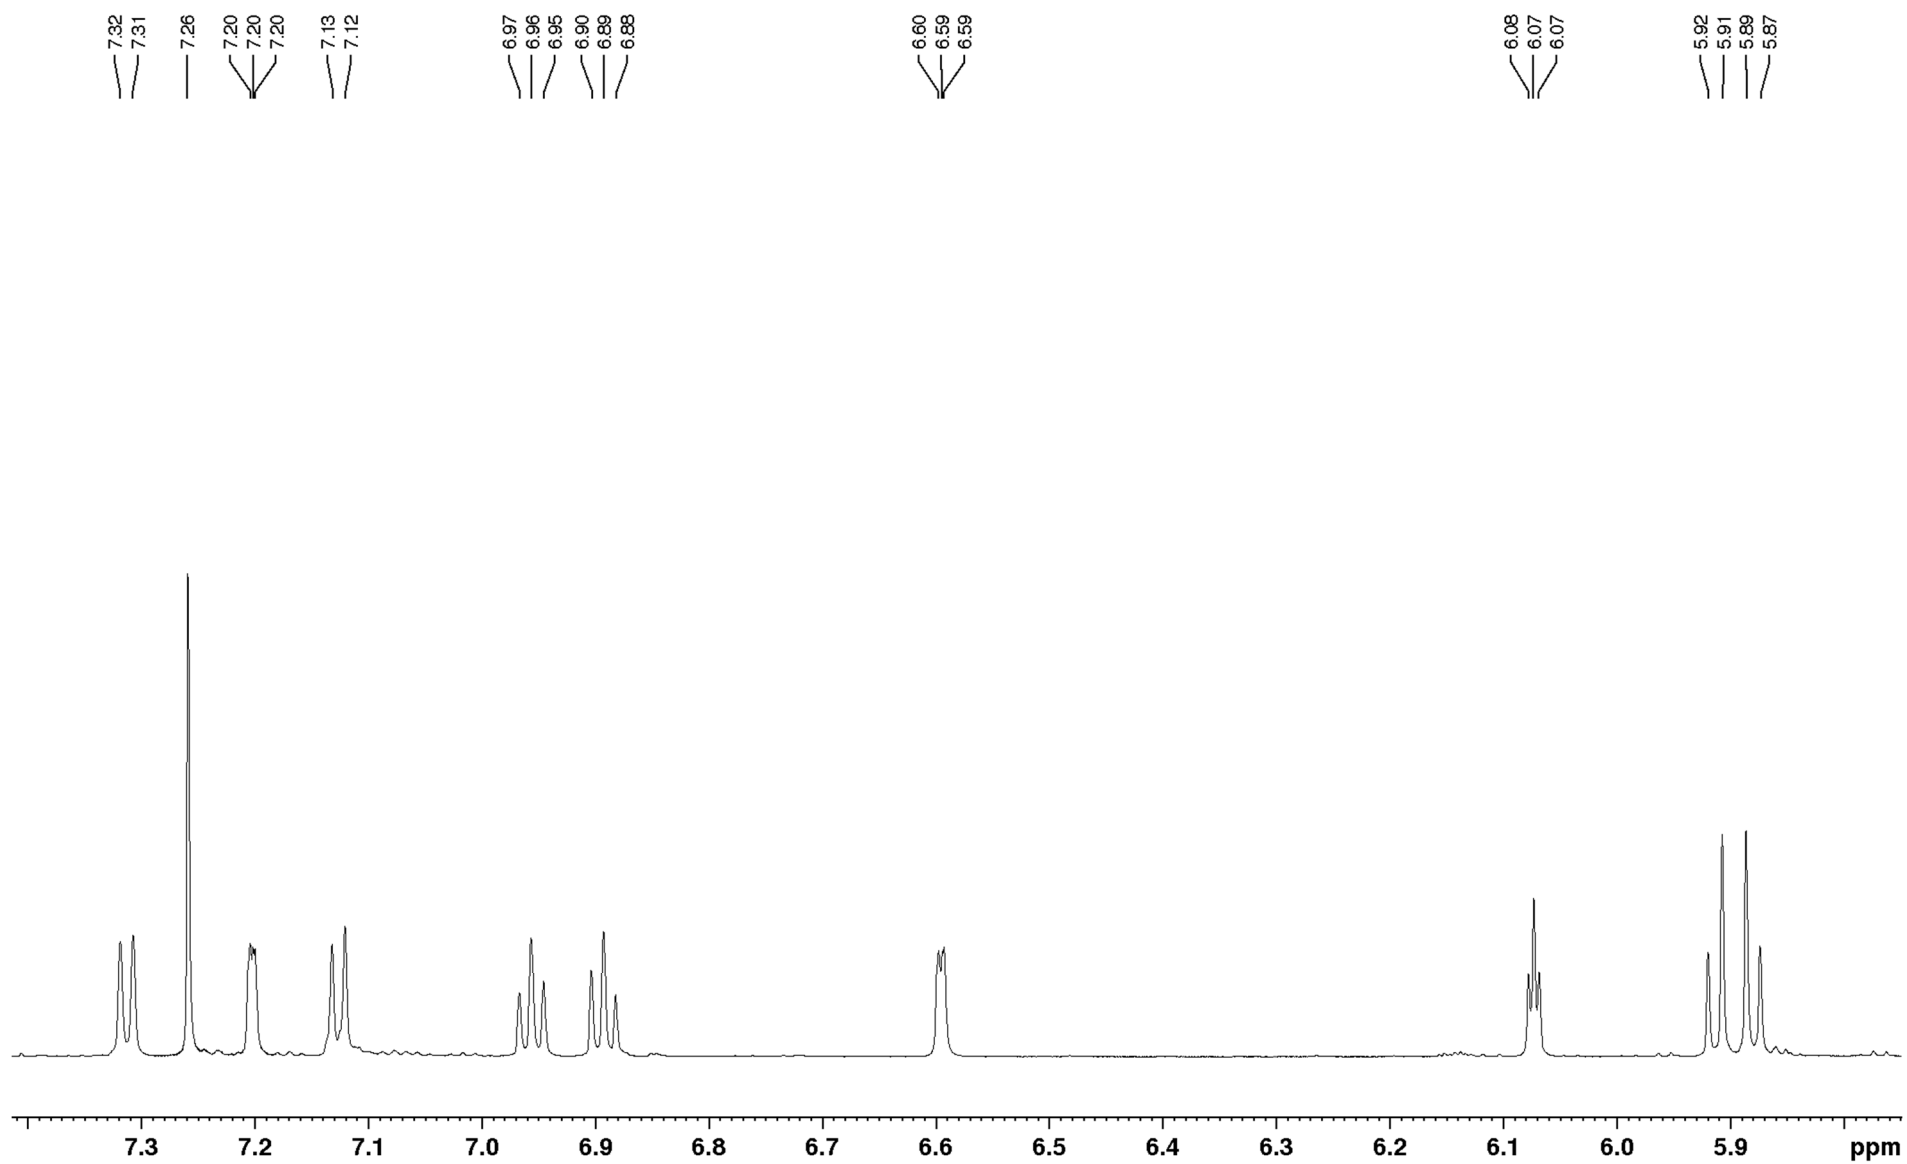

Expanded  $^1\text{H}$  NMR spectrum of **1**

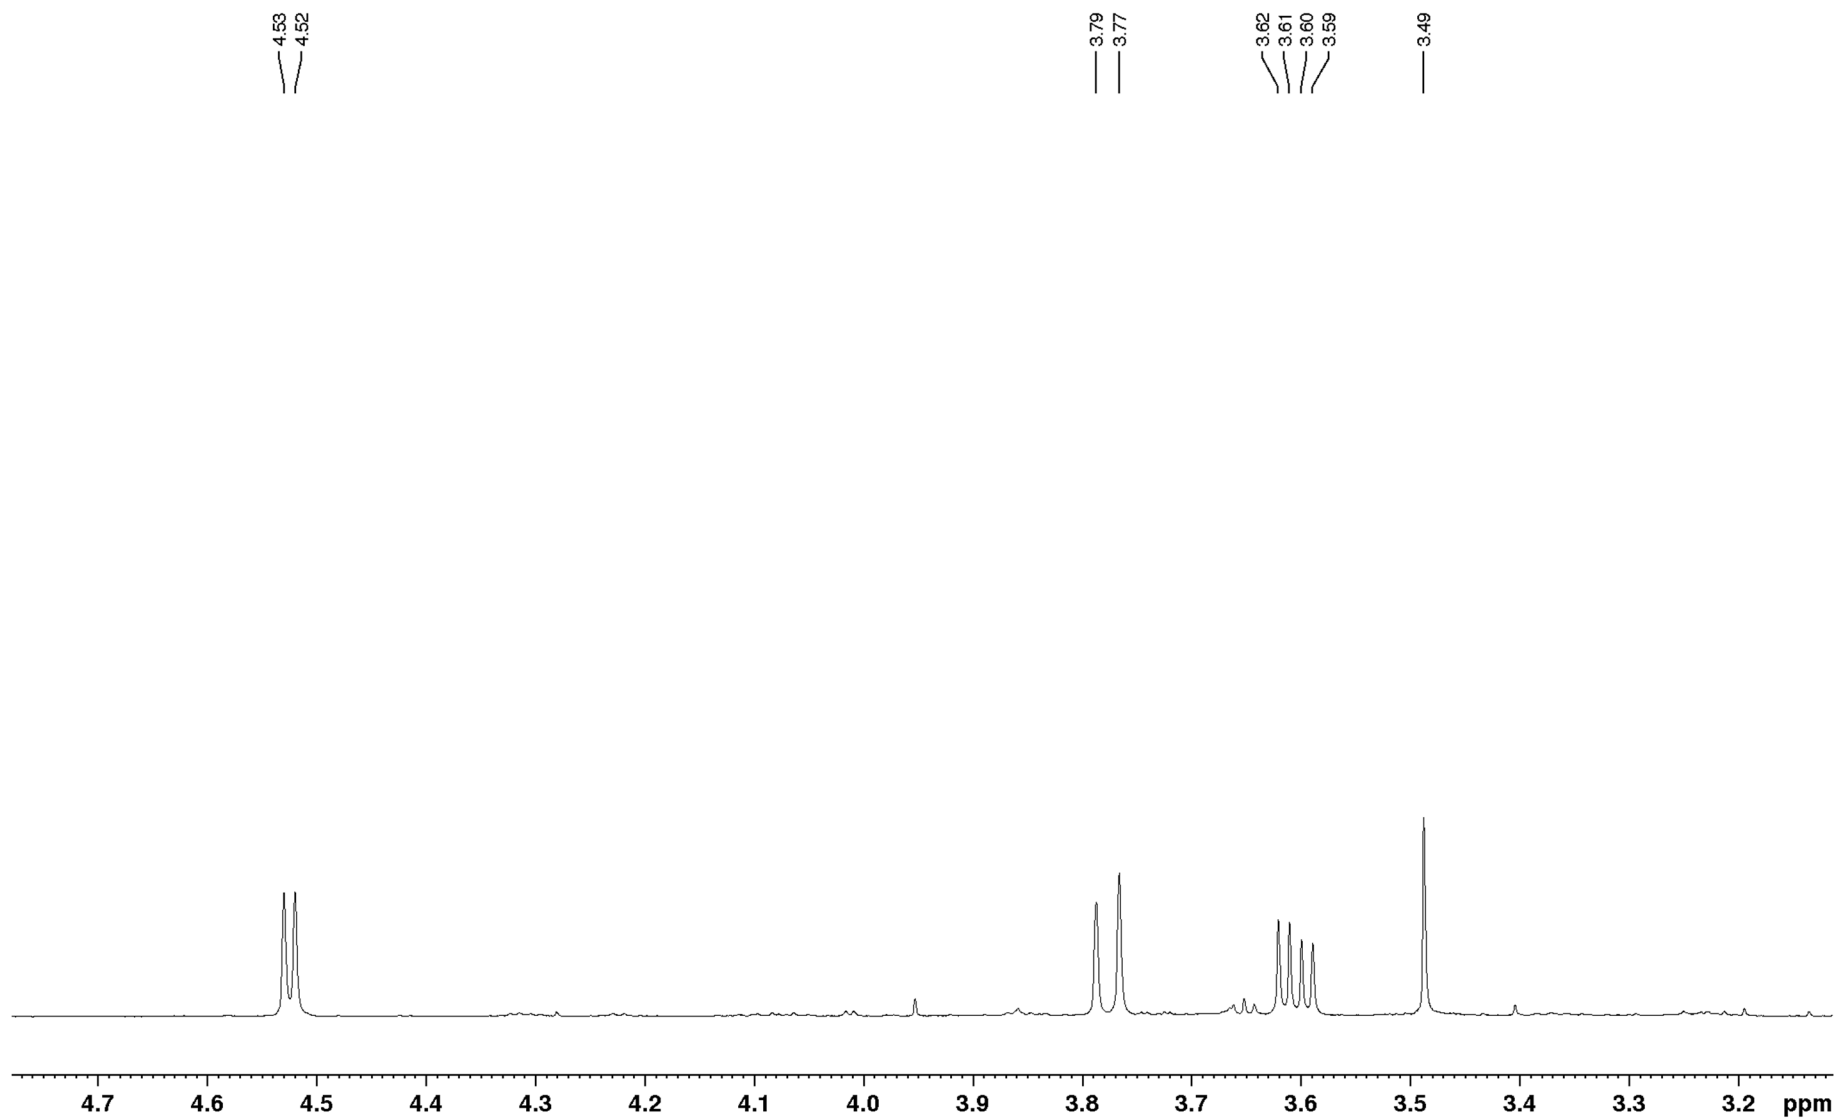

Expanded  $^1\text{H}$  NMR spectrum of **1**

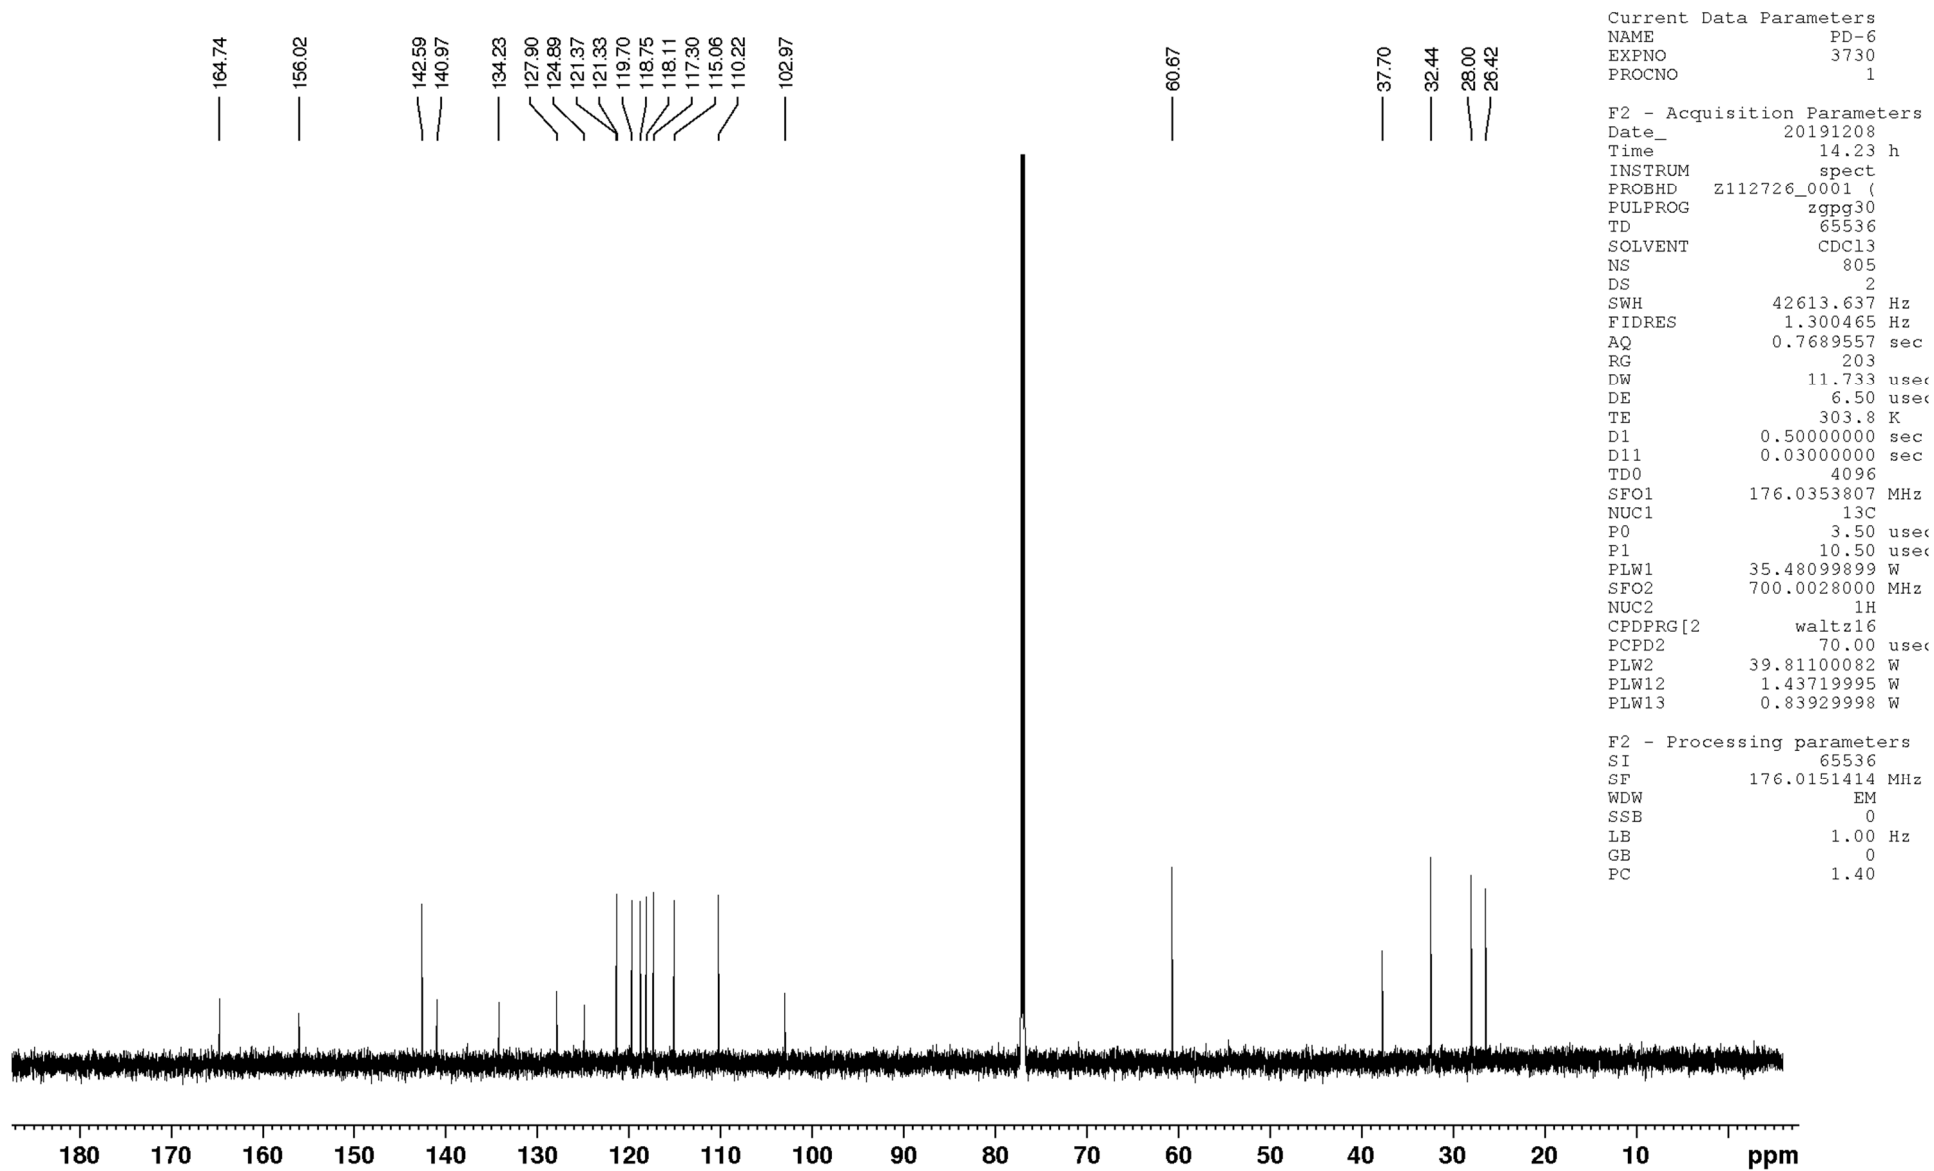

Figure S4.  $^{13}\text{C}$  NMR spectrum (176 MHz,  $\text{CDCl}_3$ ) of **1**



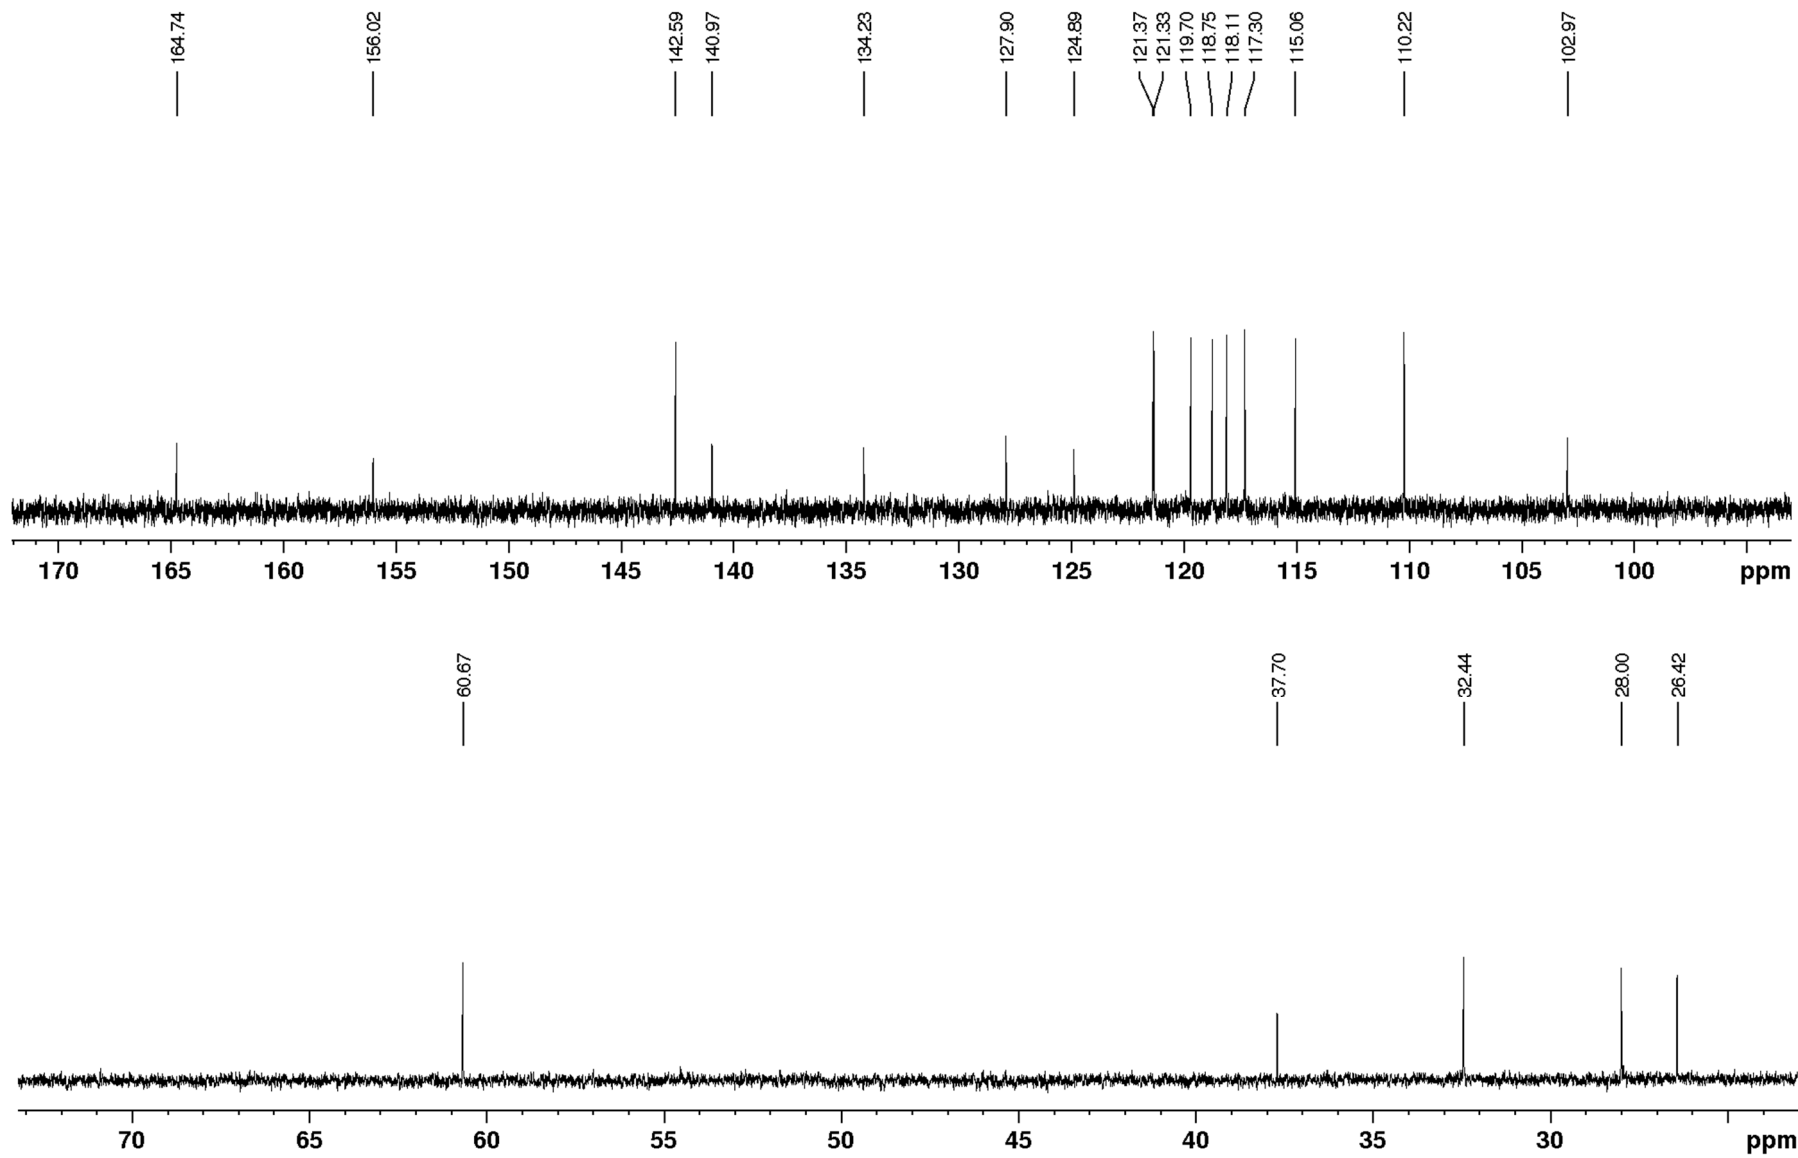

Expanded  $^{13}\text{C}$  NMR spectrum of **1**

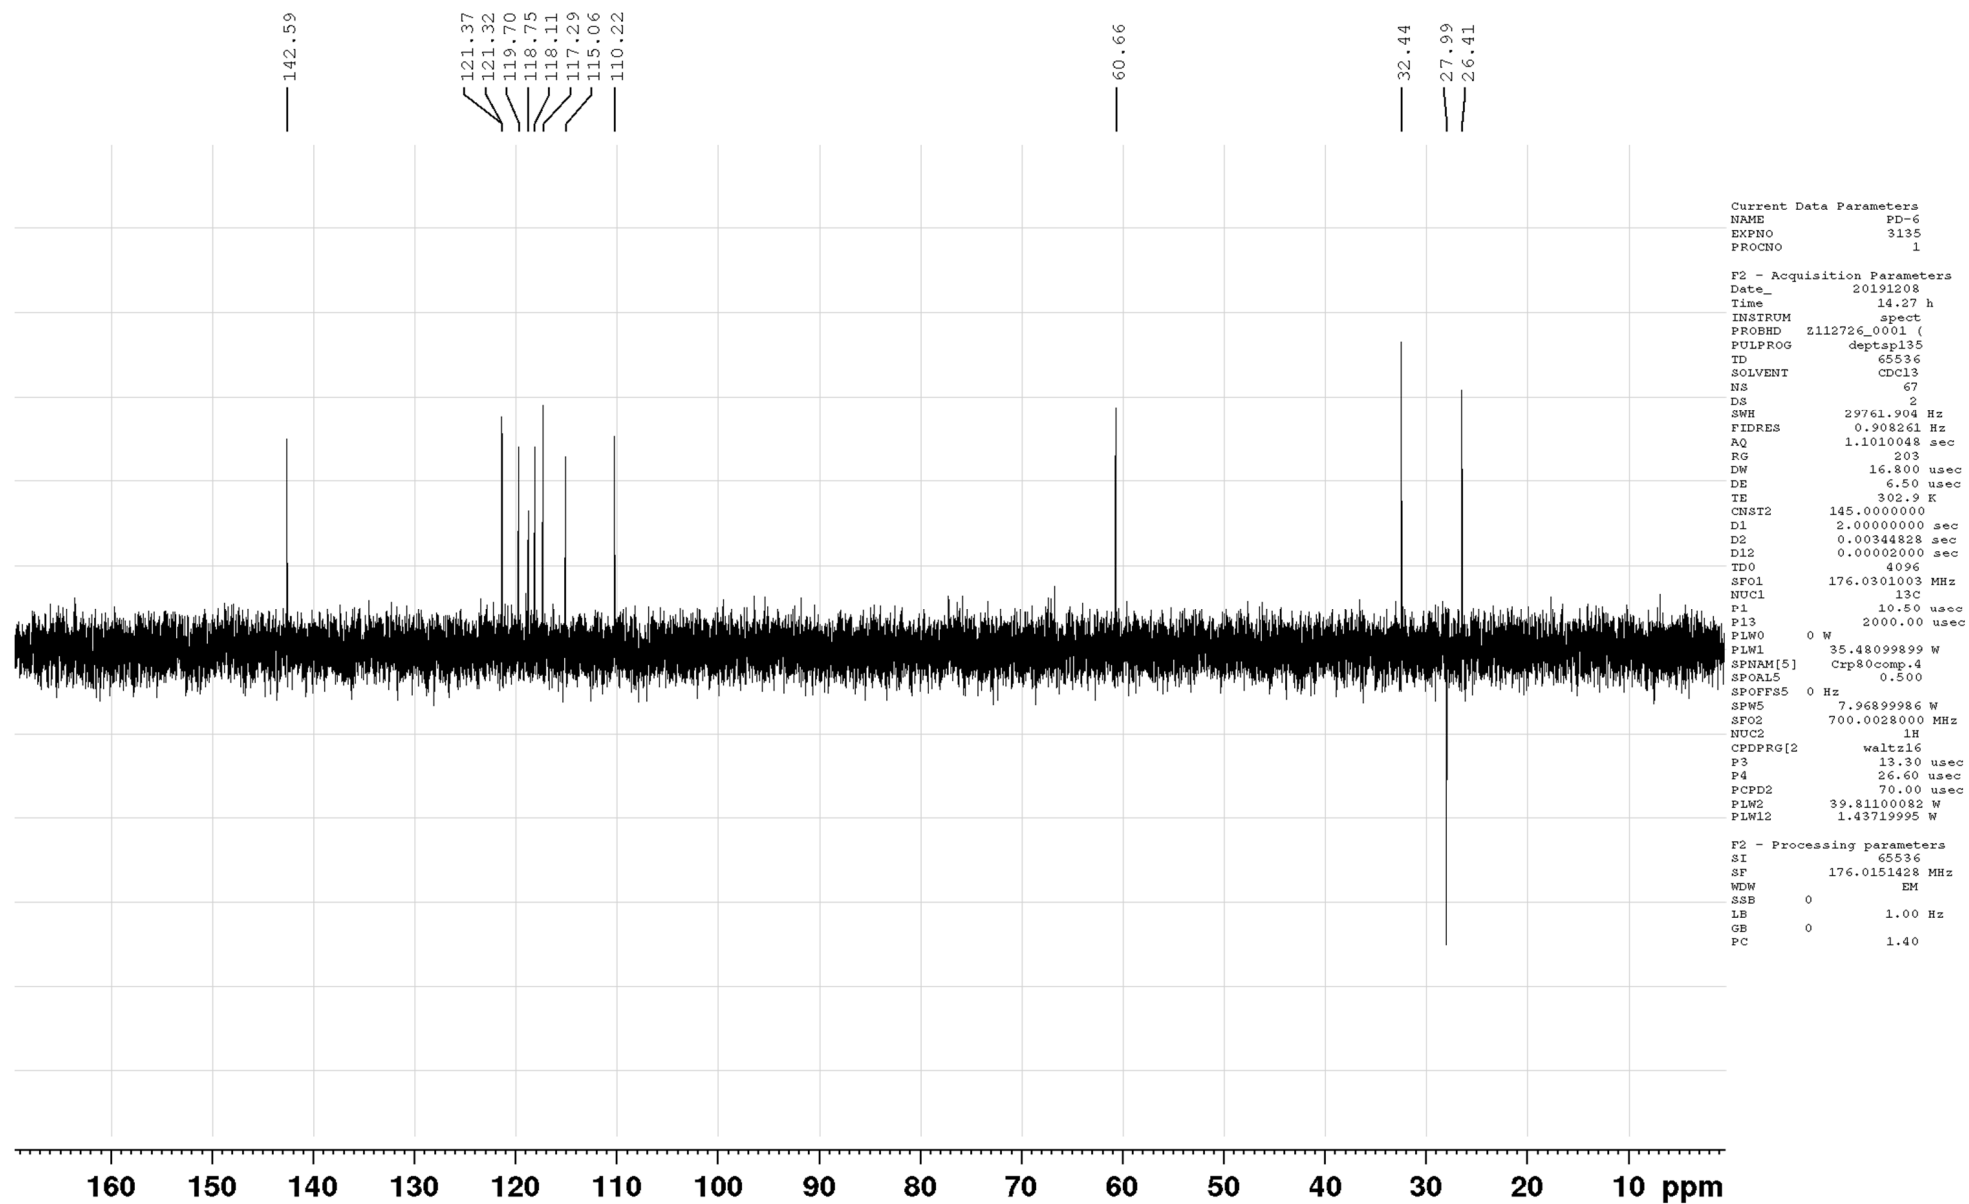

Figure S5. DEPT-135 spectrum (176 MHz,  $\text{CDCl}_3$ ) of **1**

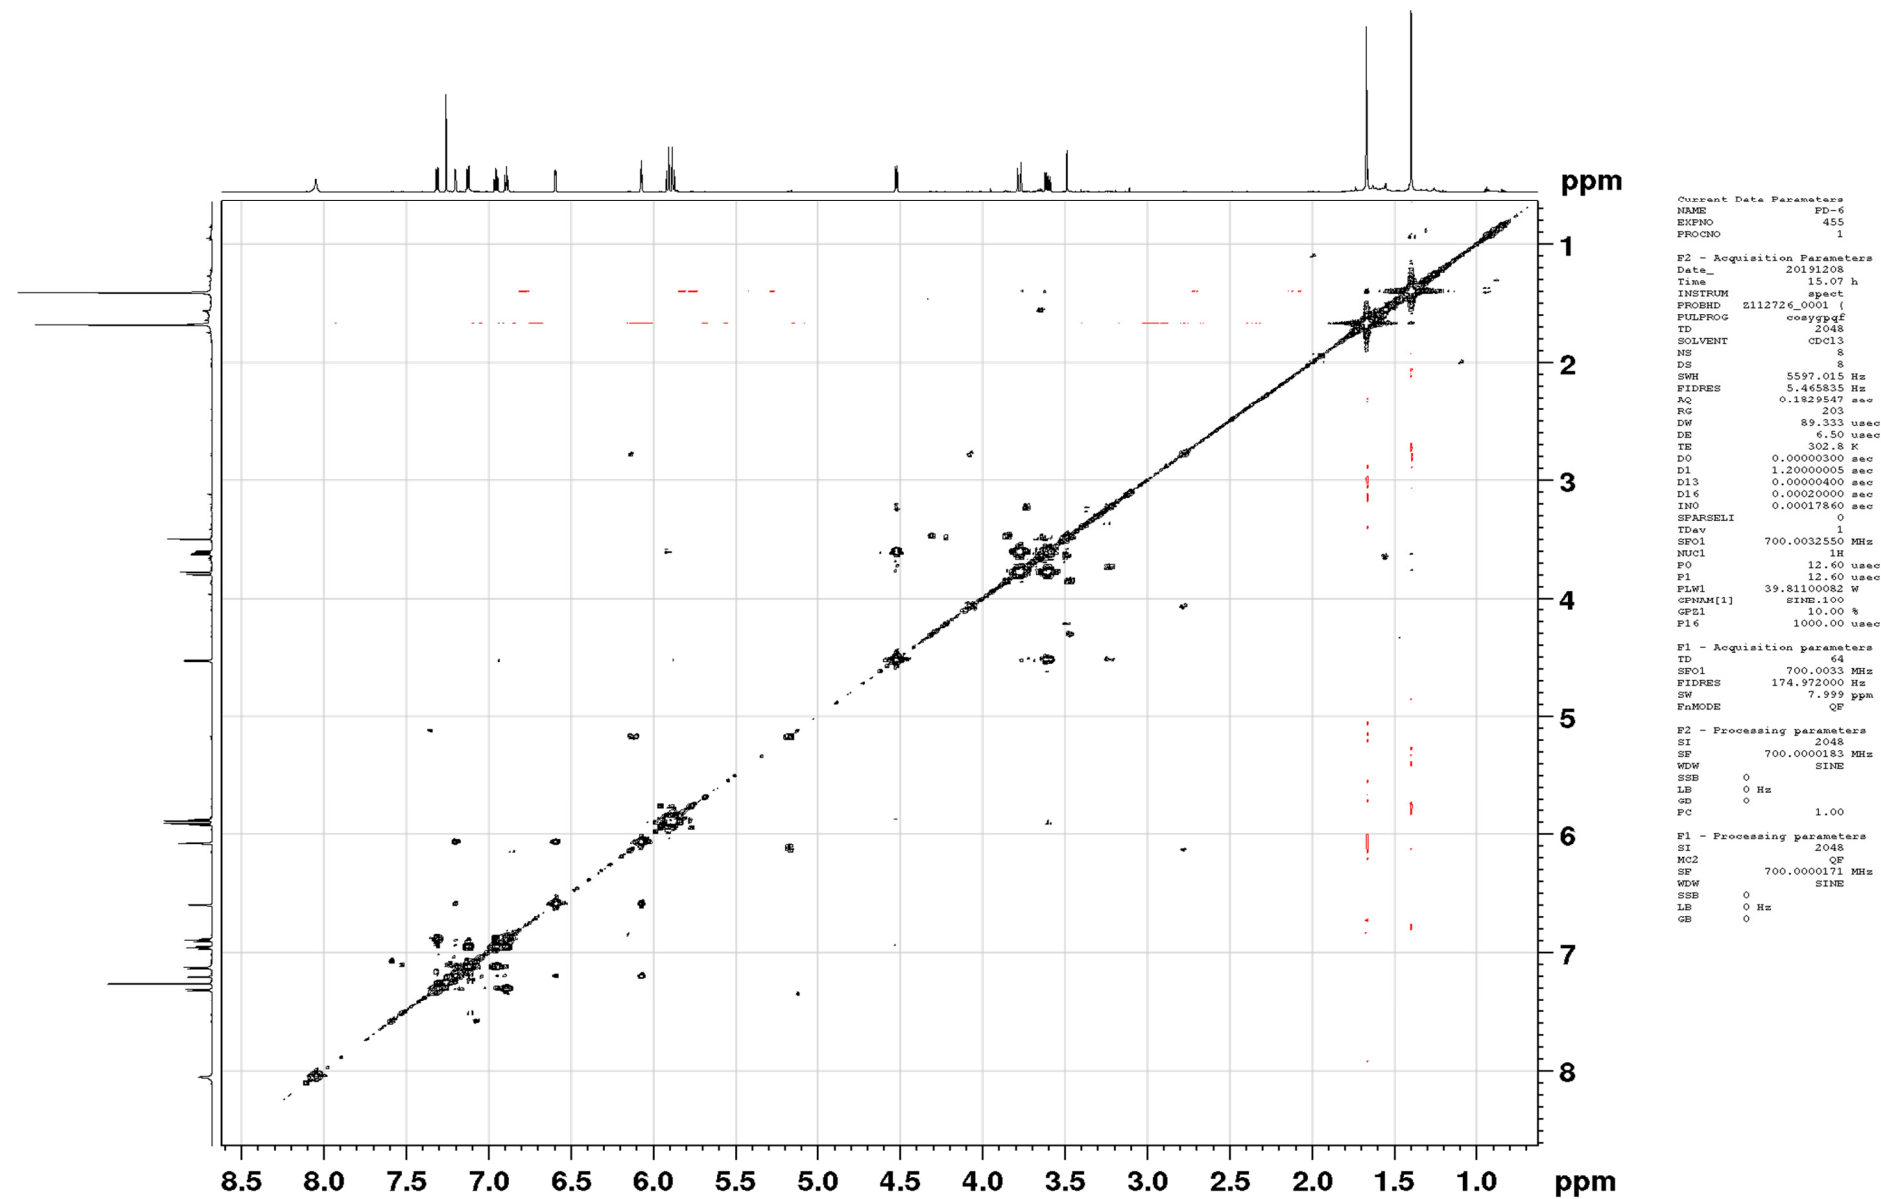

Figure S6. COSY-45 spectrum (700 MHz, CDCl<sub>3</sub>) of **1**

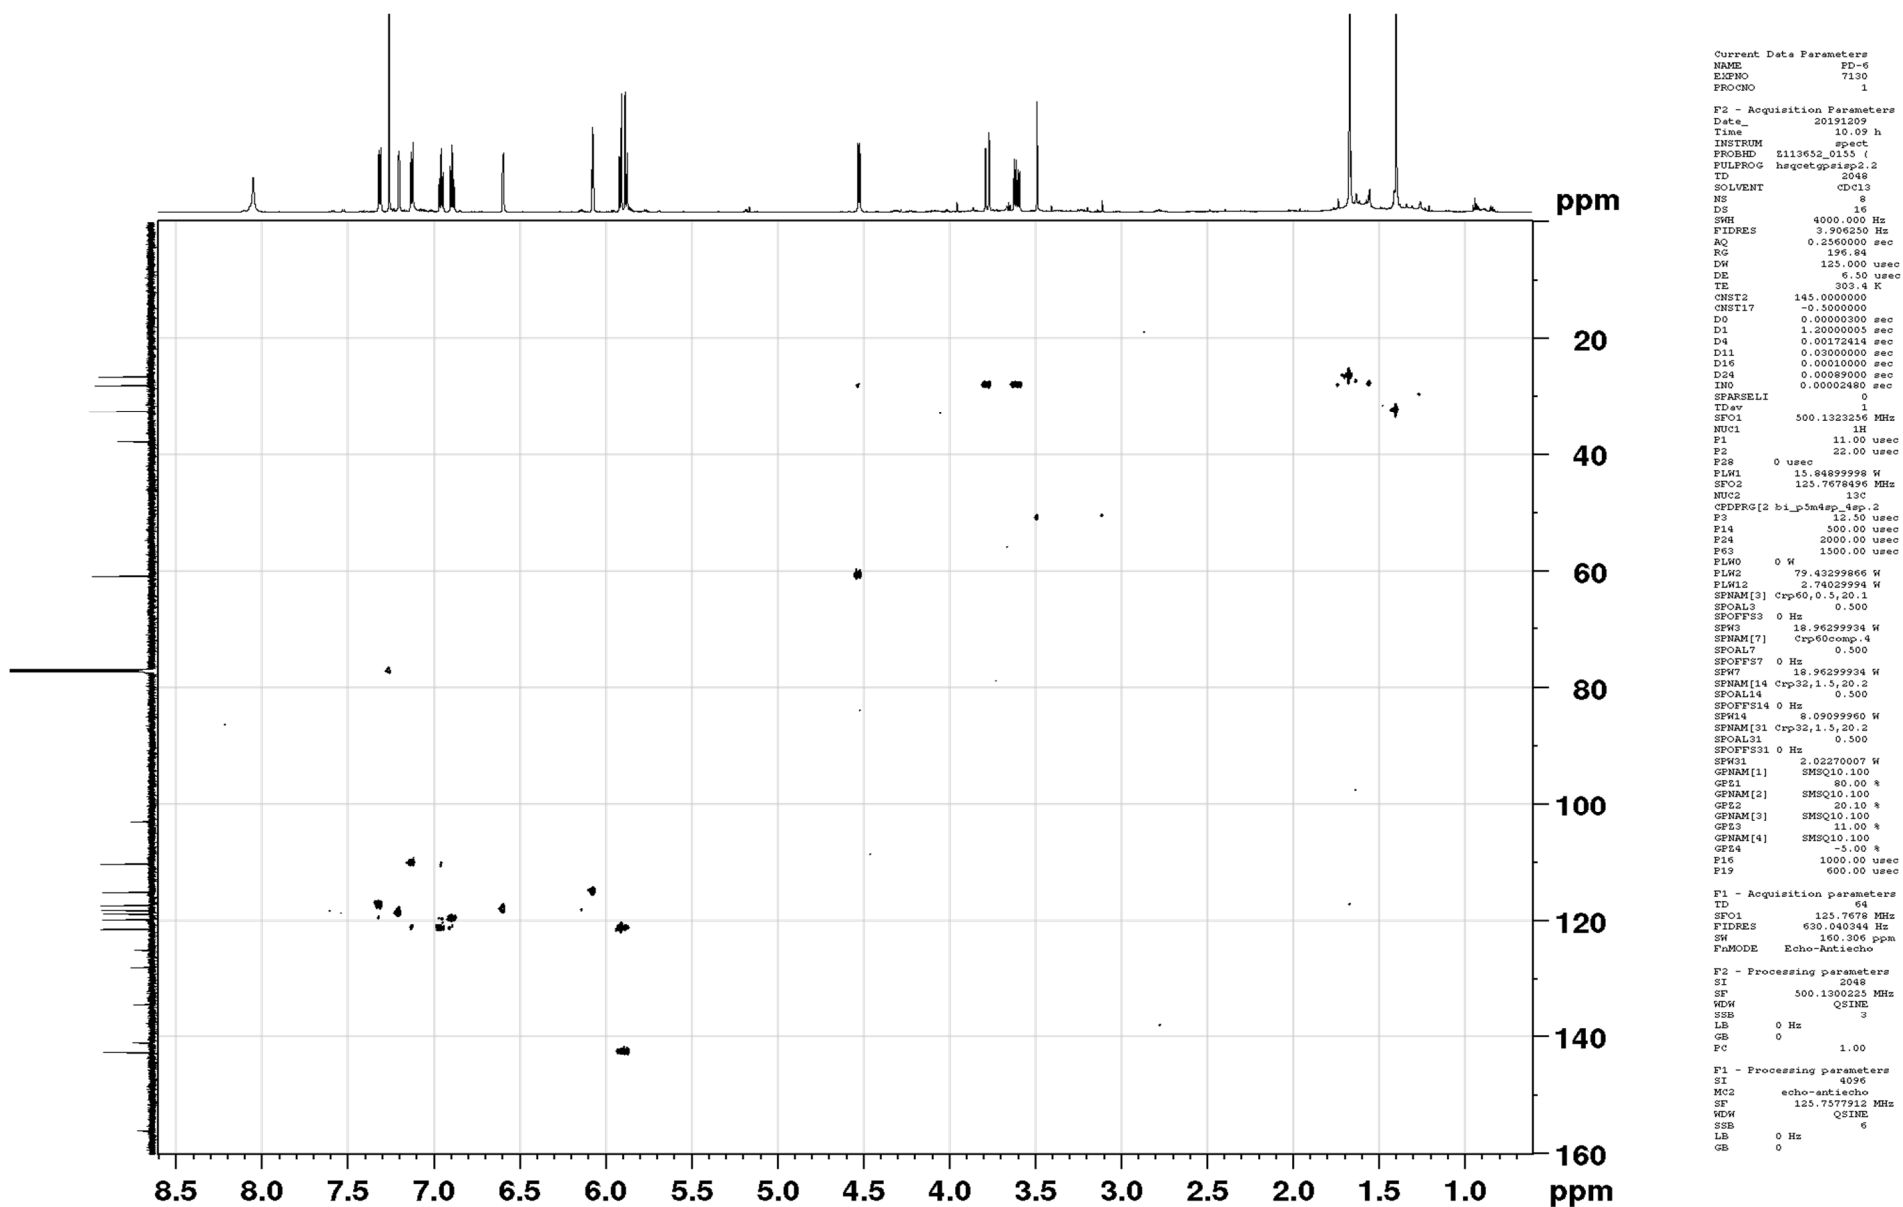

Figure S7. HSQC spectrum (500 MHz, CDCl<sub>3</sub>) of 1

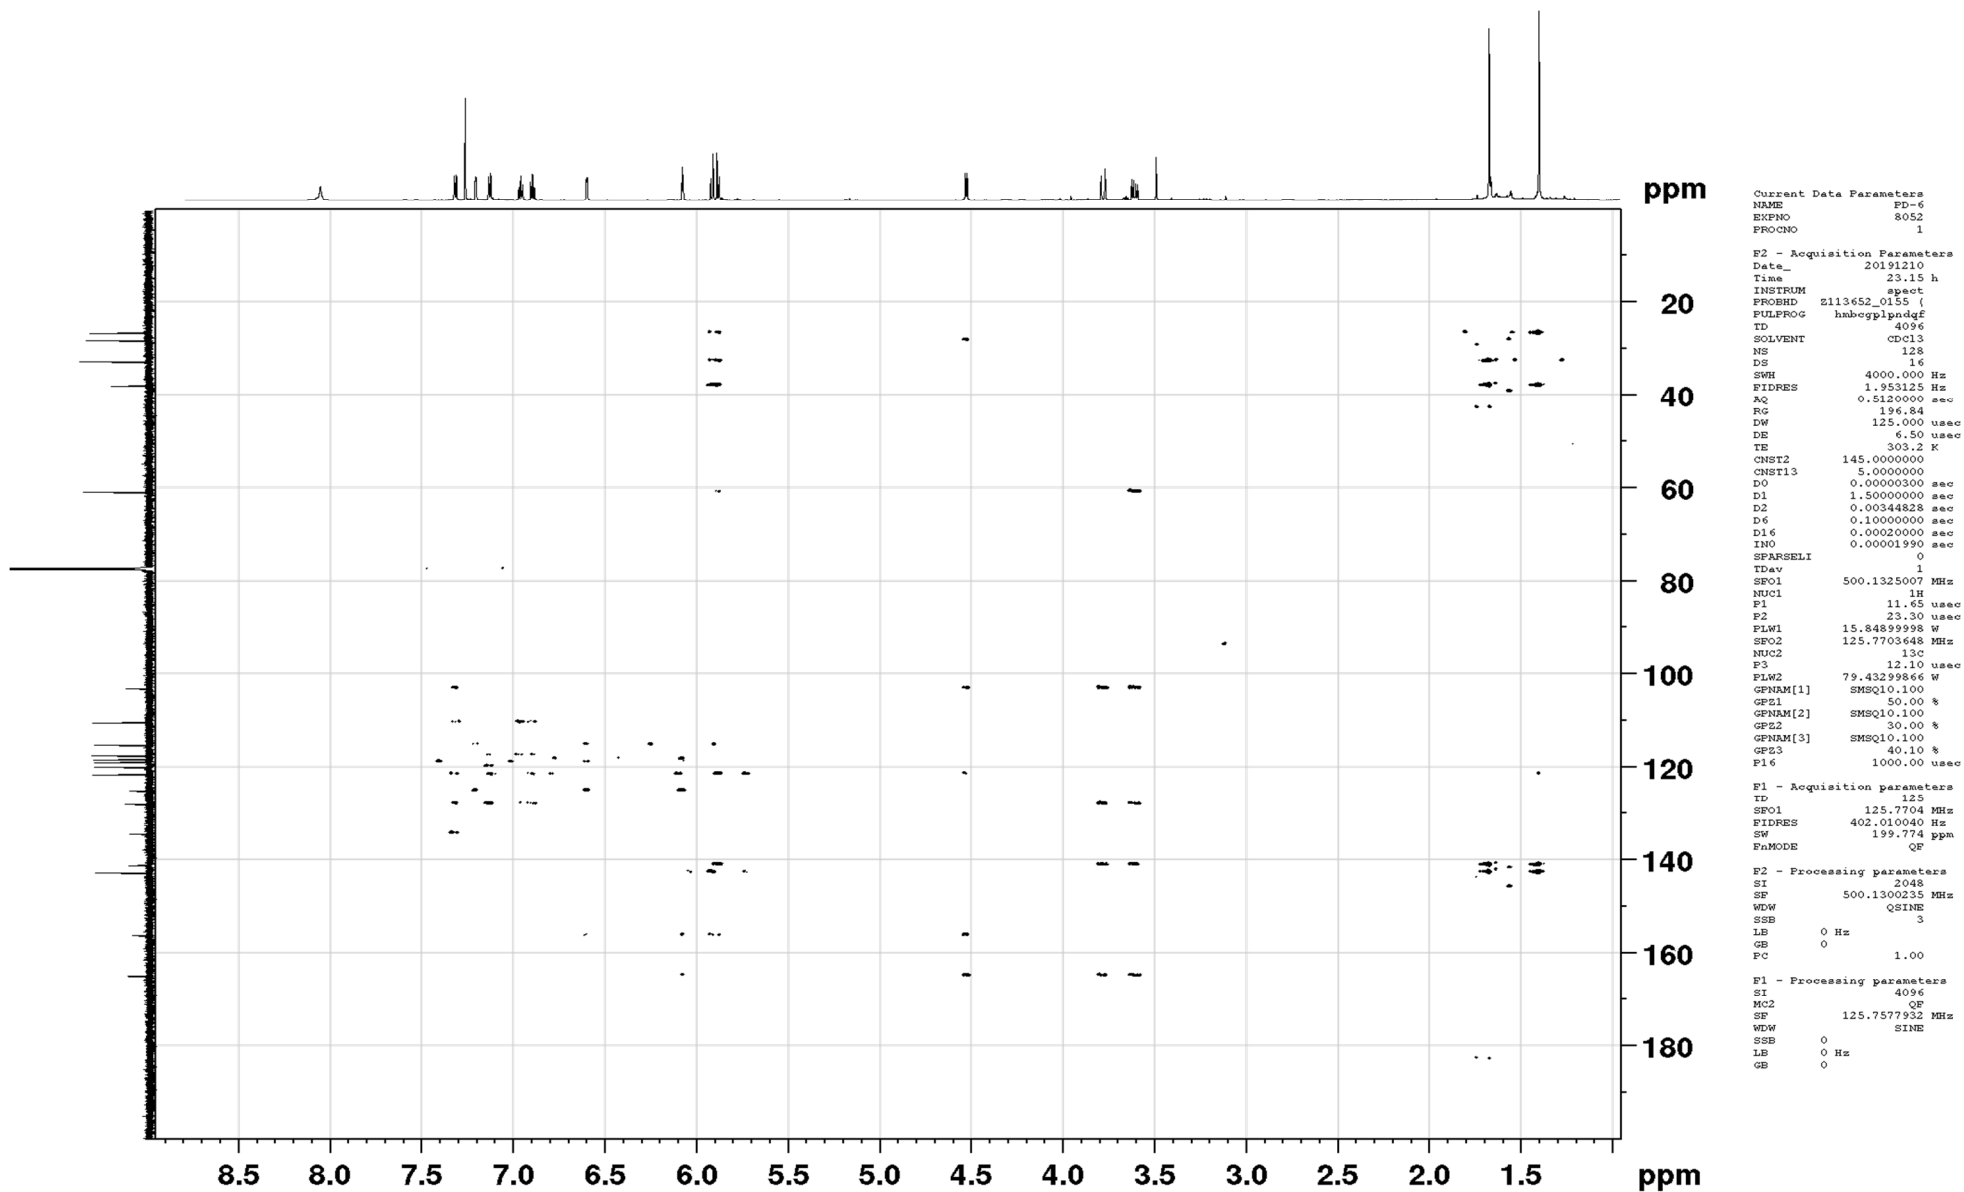

Figure S8. HMBC spectrum (500 MHz, CDCl<sub>3</sub>) of **1**

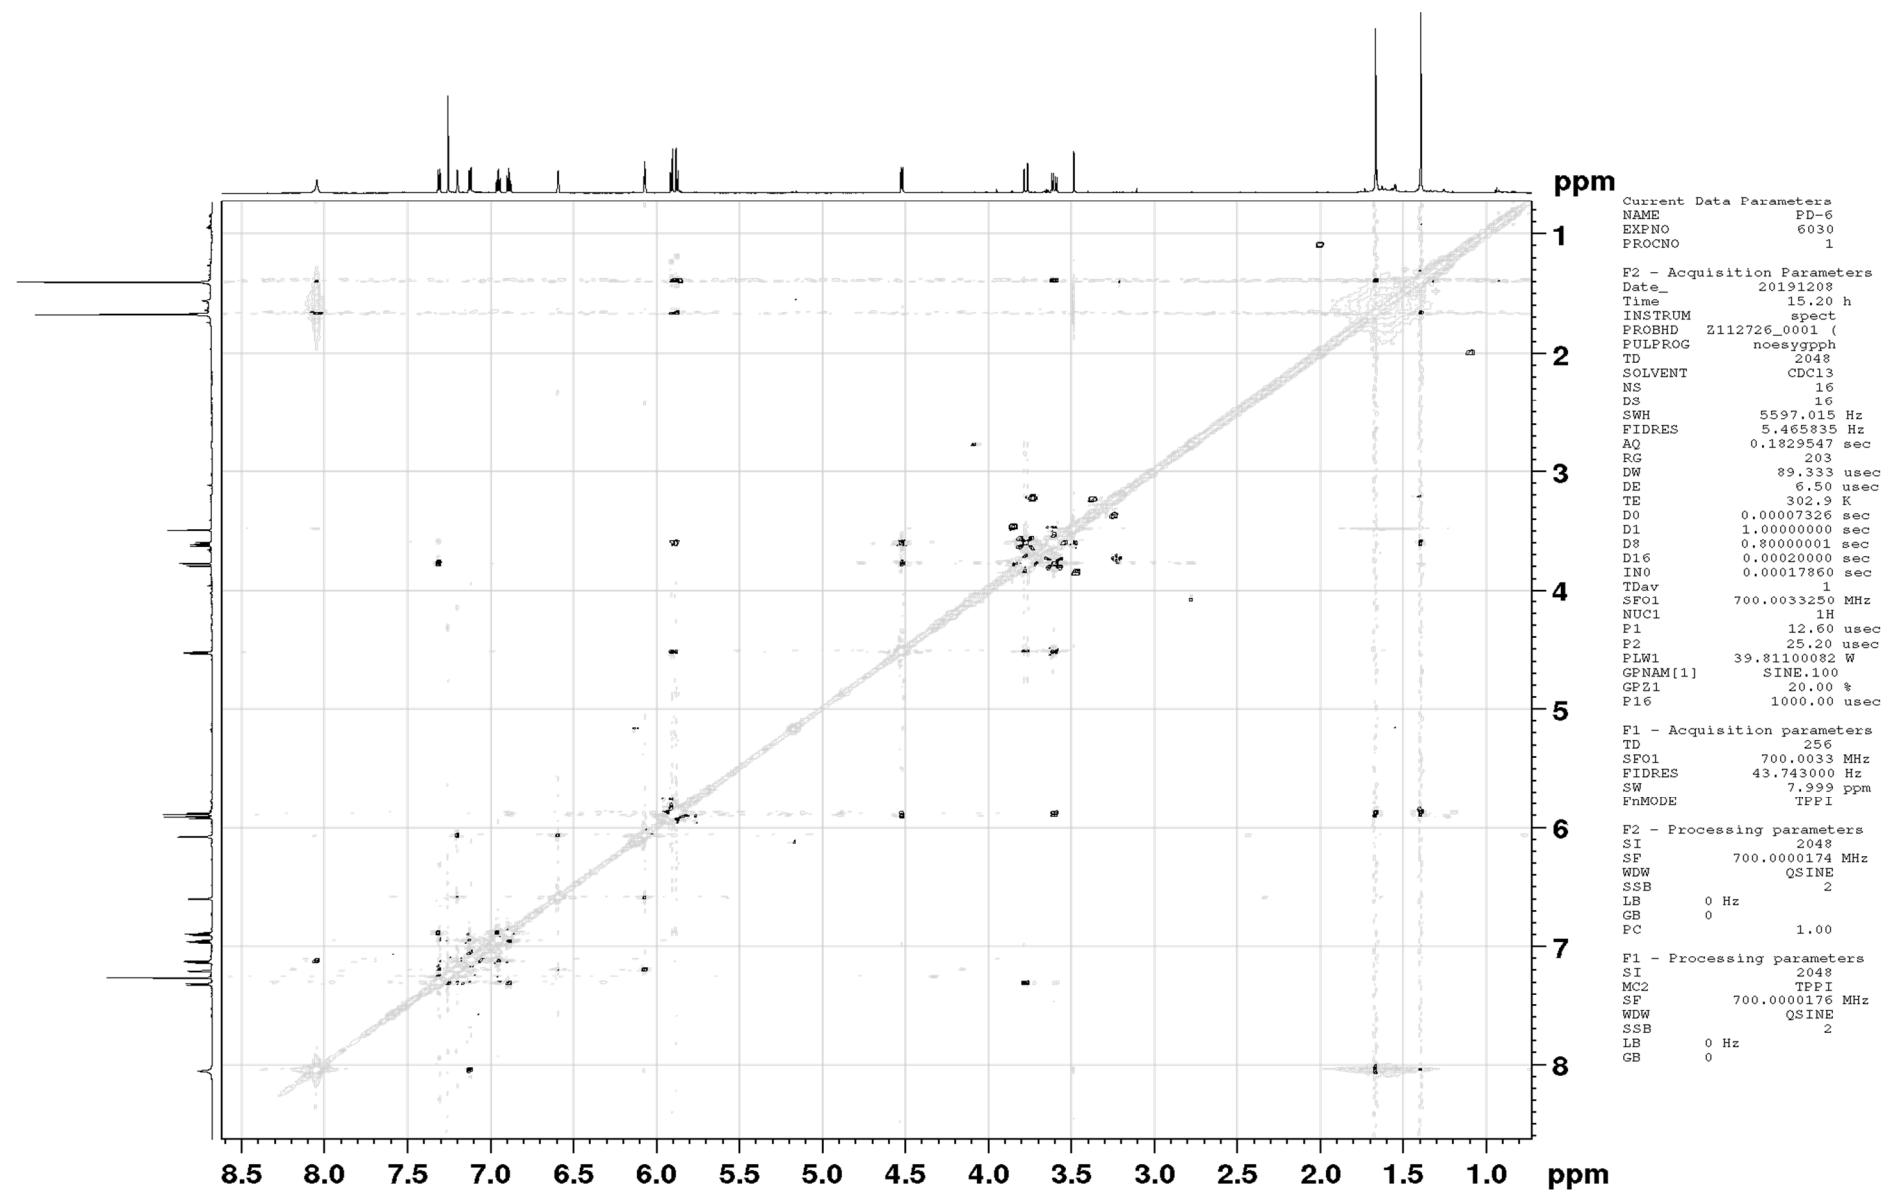

Figure S9. NOESY spectrum (700 MHz,  $\text{CDCl}_3$ ) of **1**

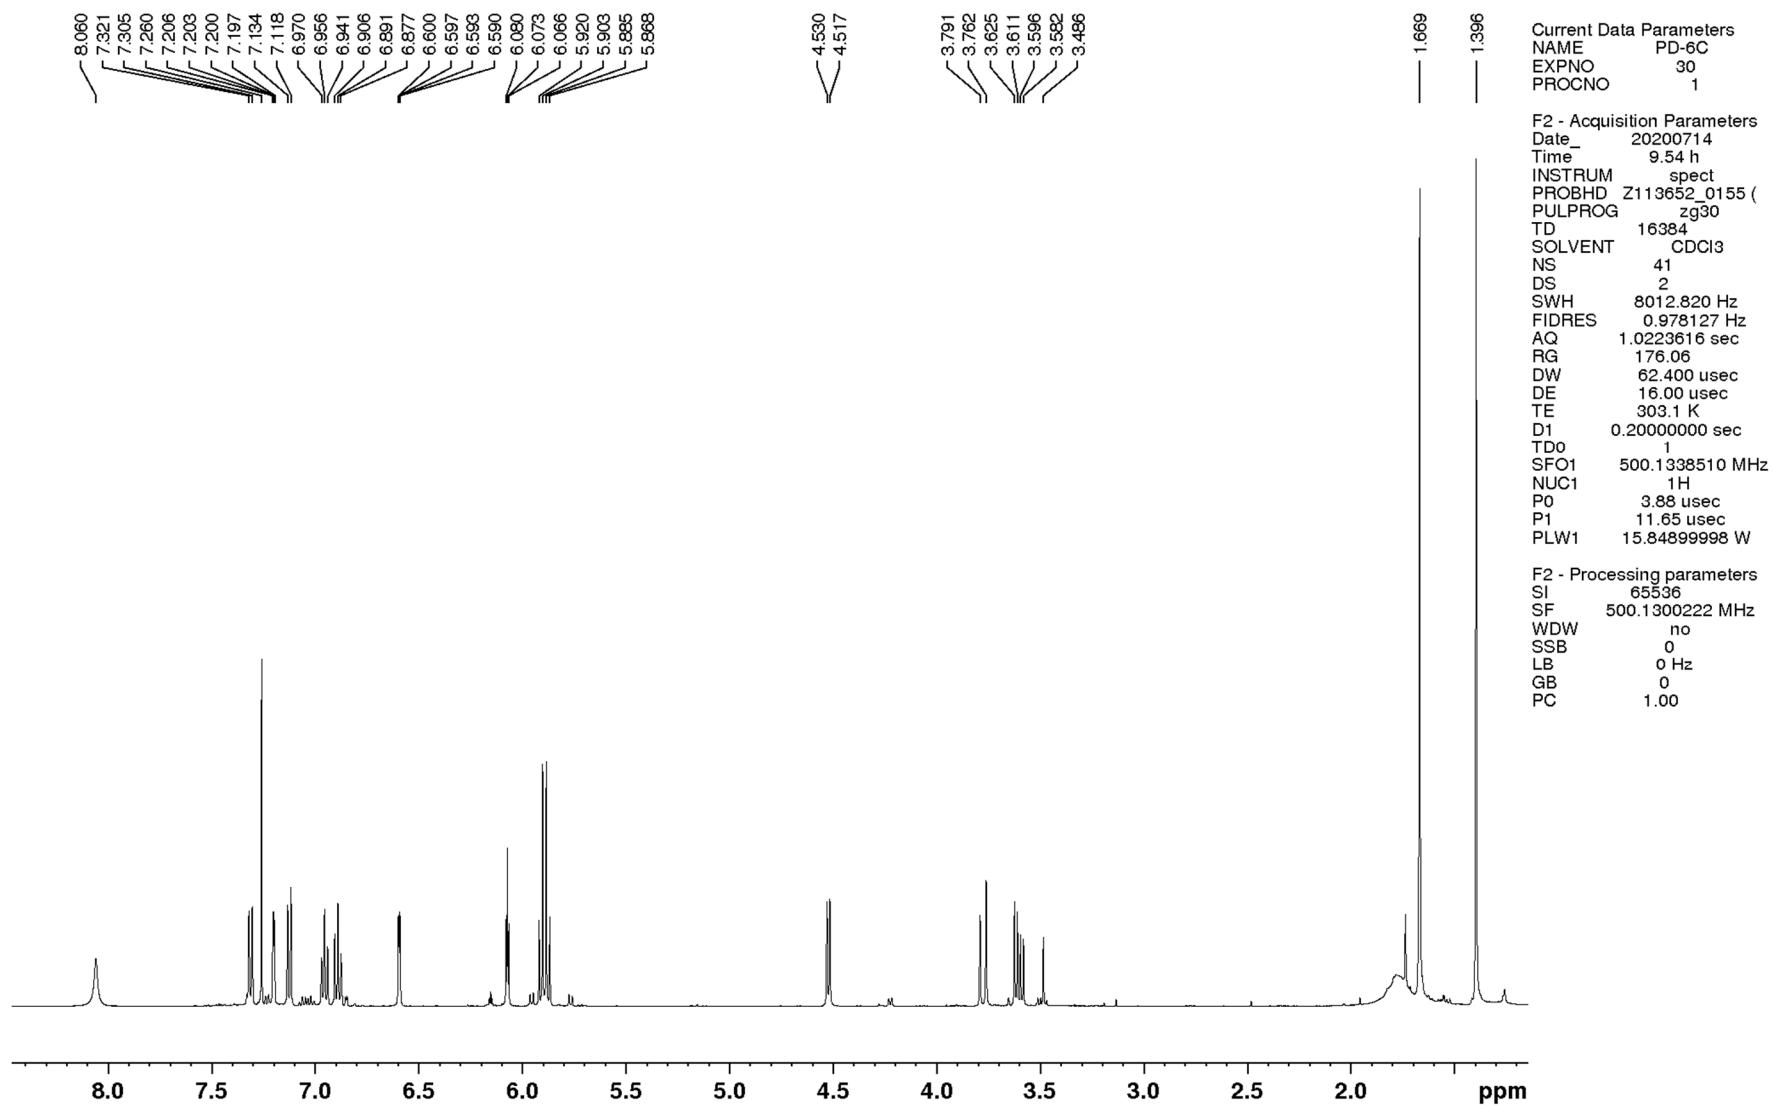

Figure S10.  $^1\text{H}$  NMR spectrum (500 MHz,  $\text{CDCl}_3$ ) of **1** (synthetic)

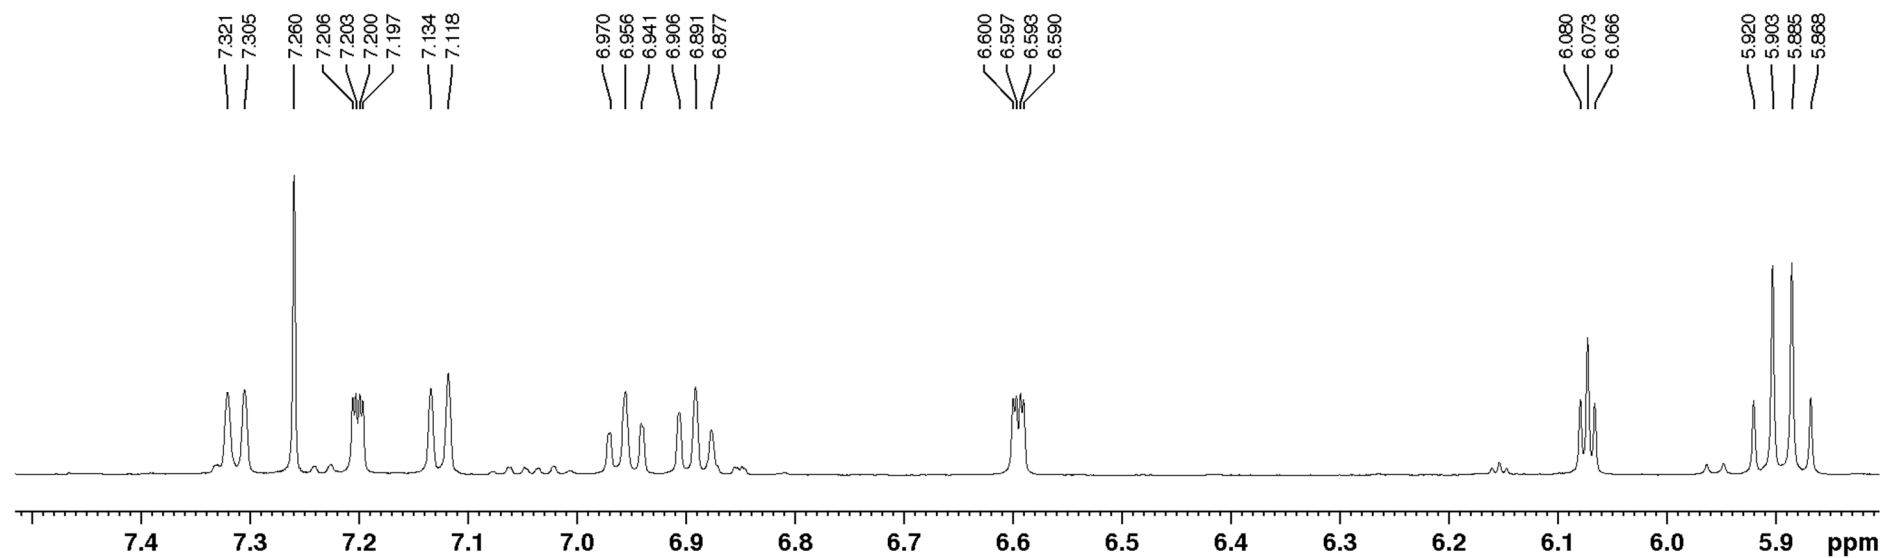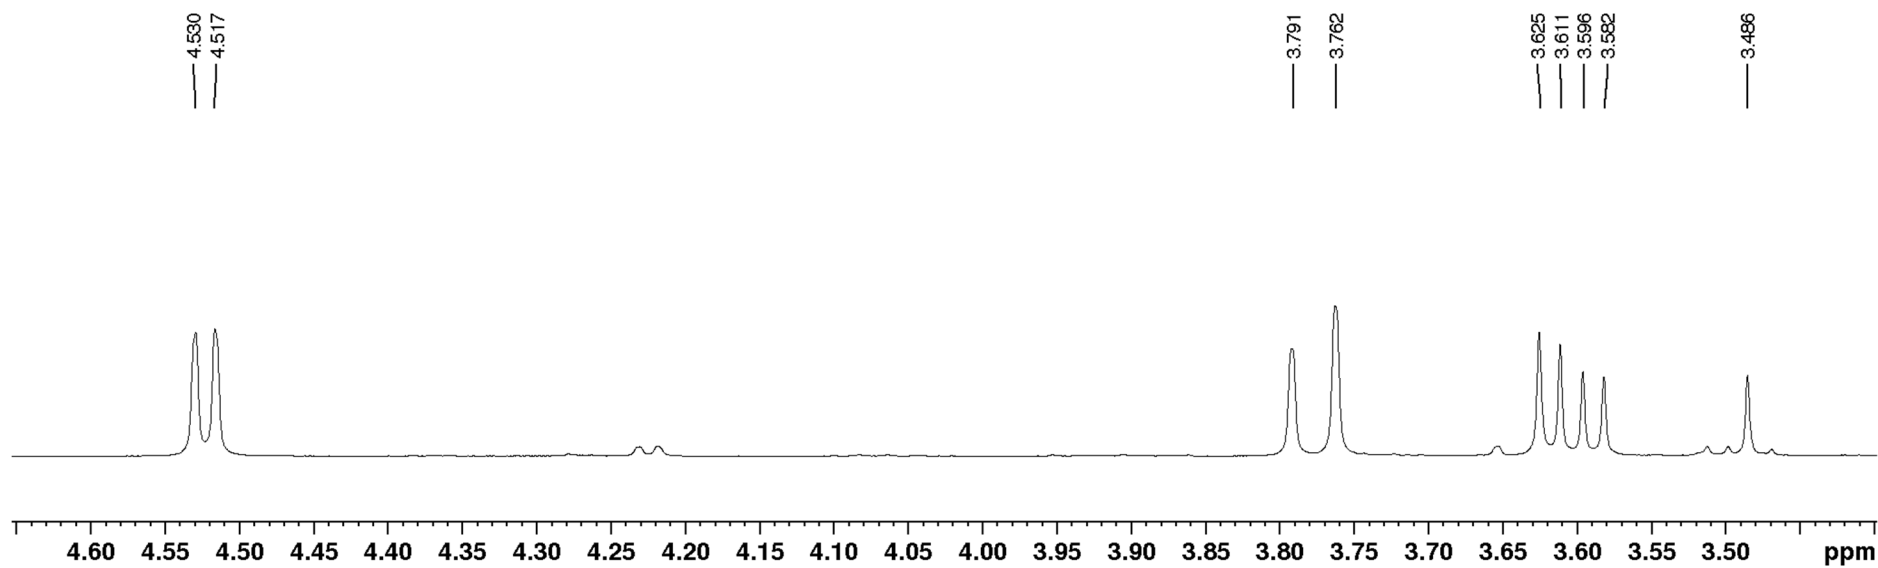

Expanded <sup>1</sup>H NMR spectrum of **1** (synthetic)



## HR(-)ESI MS

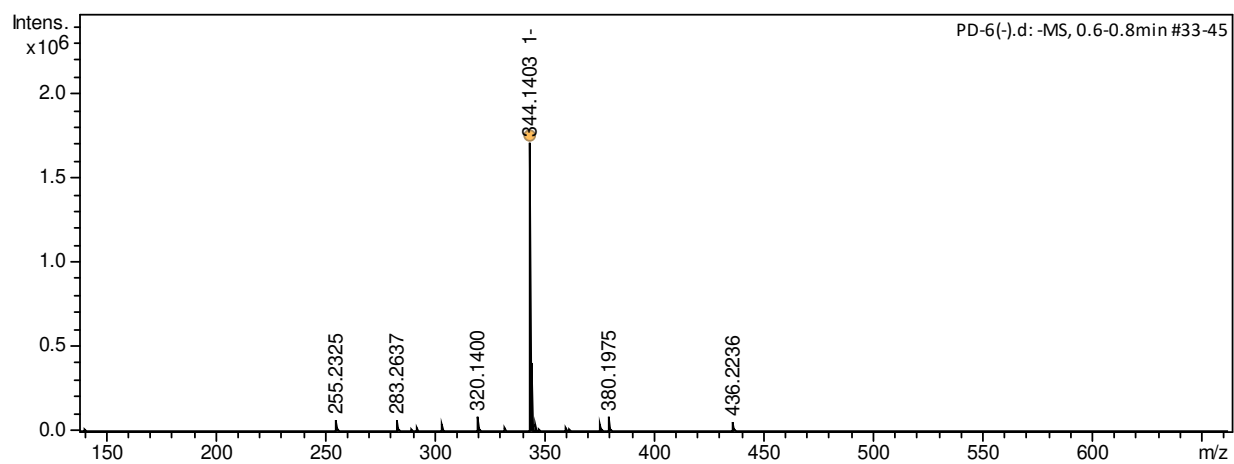

## MS/MS

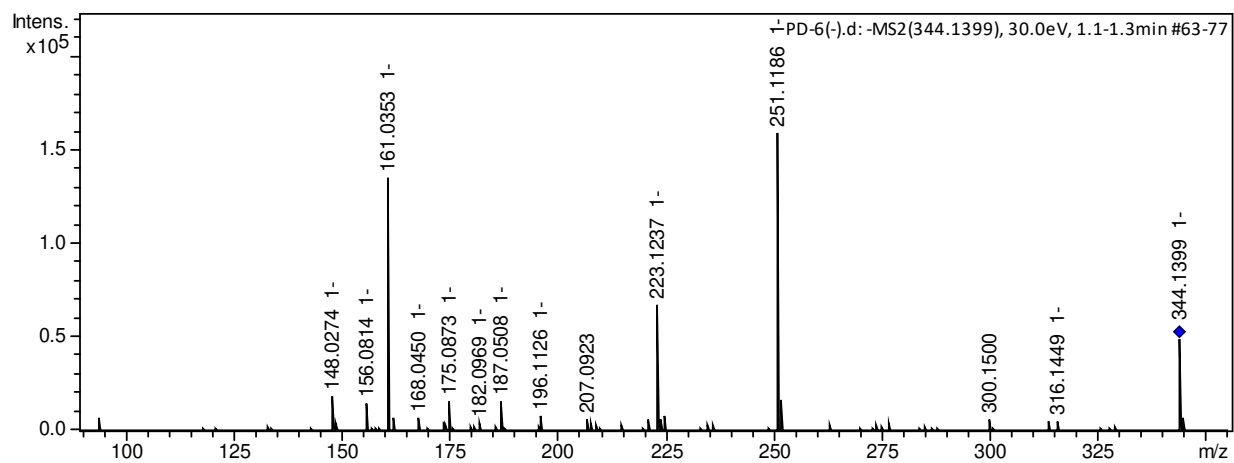

Figure S11. HR ESI mass spectrum of **1**

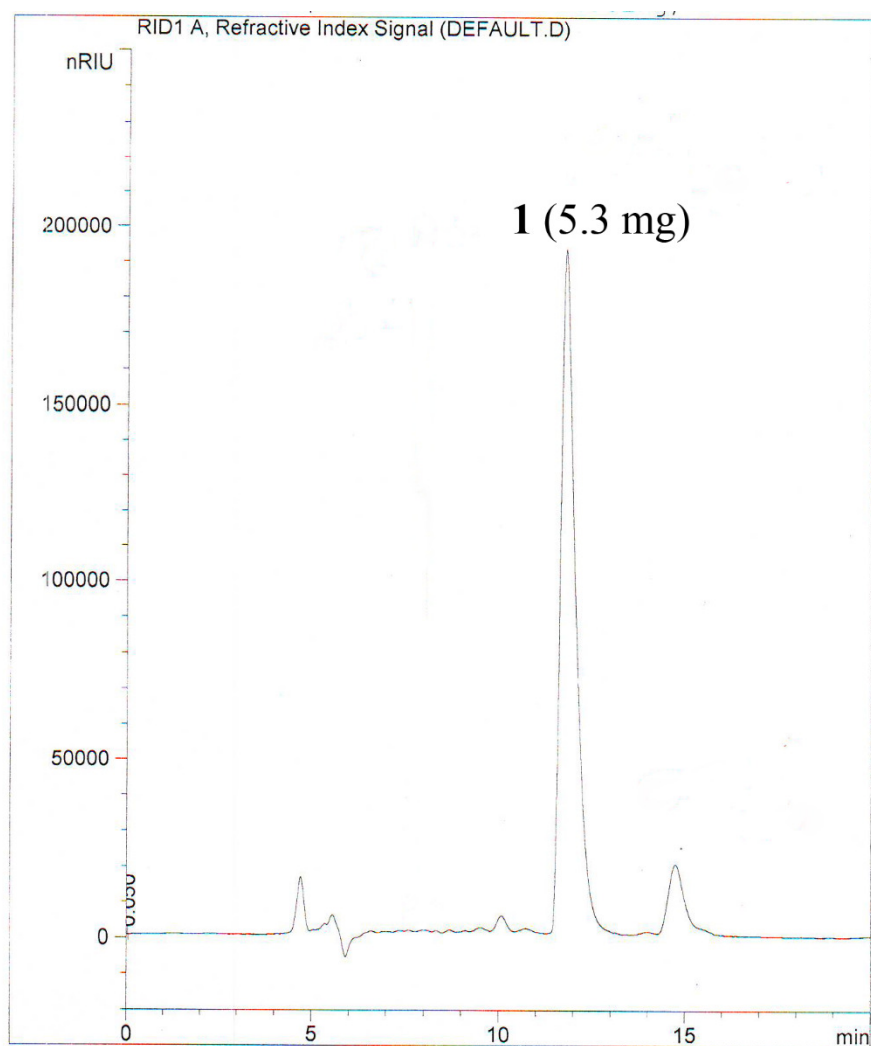

Figure S12. HPLC chromatogram of **1**. 3-CelluCoat RP (Kromasil, Sweden) (5  $\mu$ m, 4.6 mm  $\times$  150 mm) column, acetonitrile–water (50:50)
